# Supplementary material
Source: PubMed Central journal article supplement (PMC3346113)
Supplement: supp_M112.345710_jbc.M112.345710-1.pdf [file supp_M112.345710_jbc.M112.345710-1.pdf]

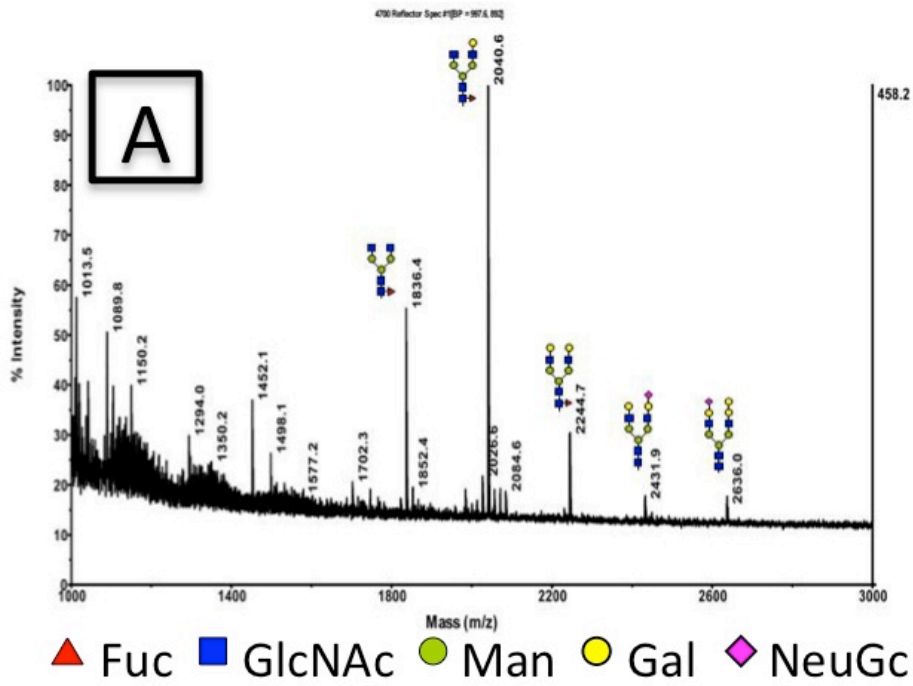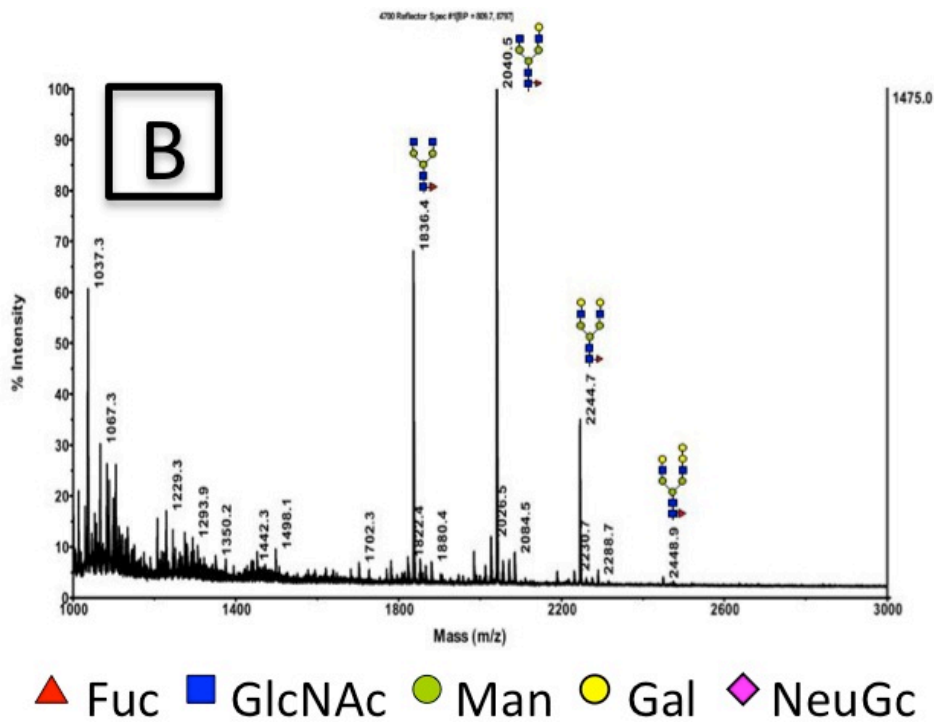

**Supplemental Figure 1: Structural elucidation of Fc glycans.** MALDI-TOF MS of the glycans recovered from purified Fc fragments of pooled sera from untreated C57BL/6 (A) or untreated *Siat1* $\Delta$ P1 (B).
